# Supplementary material for: Intermittent versus continuous oxaliplatin and fluoropyrimidine combination chemotherapy for first-line treatment of advanced colorectal cancer: results of the randomised phase 3 MRC COIN trial
Source: PubMed Central journal article supplement (PMC3159416; doi:10.1016/s1470-2045(11)70102-4), 2011-06-04
Supplement: mmc1.pdf [file mmc1.pdf]

# THE LANCET Oncology

## Supplementary webappendix

This webappendix formed part of the original submission and has been peer reviewed. We post it as supplied by the authors.

Supplement to: Adams RA, Meade AM, Seymour MT, et al, on behalf of the MRC COIN Trial Investigators. Intermittent versus continuous oxaliplatin and fluoropyrimidine combination chemotherapy for first-line treatment of advanced colorectal cancer: results of the randomised phase 3 MRC COIN trial. *Lancet Oncol* 2011; published online June 4. DOI:10.1016/S1470-2045(11)70102-4.

## **Web Appendix**

Title: “Intermittent versus continuous oxaliplatin and fluoropyrimidine combination chemotherapy in the first-line treatment of patients with advanced colorectal cancer: results of the randomised phase 3 MRC COIN trial.”

### **List of Clinical Investigators** (Institution – [number of patients contributed]):

C Lowdell, RH Phillips, R Ahmad, P Riddle, A Creak (Charing Cross Hospital, London, UK [81]); J Cassidy, A McDonald, A Waterston, N Mohammed, J White, H Yosef, A Hennessy (Beatson Oncology Centre, Glasgow, UK [81]); EM Bessell, V Potter (Nottingham City Hospital, Nottingham, UK [72]); M Seymour, A Anthony, A Melcher, R Cooper, D Sebag-Montefiore (St. James' University Hospital, Leeds, UK [69]); P Ross, M Leslie, N Maisey, A Gaya, G Mikhael (Guy's and St. Thomas's Hospitals, London, UK [67]); J Summers, M Hill, R James (Maidstone Hospital, Maidstone, UK [64]); TS Maughan, A Brewster, T Crosby, S Mukherjee, N Iqbal (Velindre Hospital, Cardiff, UK [63]); J Wadsley, D Furniss, S Pledge, J Hornbuckle, S Clenton (Weston Park Hospital, Sheffield, UK [63]); R Glynn-Jones, M Harrison, S Mawdsley, N Anyamene, R Hughes (Mount Vernon Hospital, UK [57]); D Propper, C Cottrill (St. Bartholomew's Hospital, London, UK [57]); D Smith, S Myint, N Ali, M Iqbal, P Clark, B Haylock (Clatterbridge Centre for Oncology, UK [50]); T Iveson, A Bateman, C Baughan (Southampton Hospital, UK [46]); S Falk, K Hopkins (Bristol Oncology Centre, Bristol, UK [45]); J Bridgewater, S Karp (North Middlesex Hospital, London, UK [44]); C Topham, G Middleton, S Essapen, S Cummins (Royal Surrey County Hospital, UK [44]); B Sizer (Essex County Hospital, UK [42]); S Gollins (Glan Clwyd Hospital, UK [42]); A Maraveyas (Castle Hill Hospital, Hull, UK [41]); S Tahir (Broomfield Hospital, Essex, UK [36]); J Bridgewater (Princess Alexandra Hospital, UK [36]); C Blesing (Great Western Hospital, Swindon, UK [34]); H Wasan (Hammersmith Hospital, London, UK [34]); M Tighe, S Falk (Musgrove Park Hospital, Taunton [34]); R Ellis (Royal Cornwall Hospital, UK [34]); J Dent, JK Joffe (Huddersfield Royal Infirmary, UK [33]); S Shepherd, K Benstead, D Farrugia (Cheltenham General Hospital, UK [32]); P Mack, A Hamid, M Butt, R Roy (Diana, Princess of Wales Hospital, Grimsby, UK [31]); T Hickish (Royal Bournemouth Hospital, UK [31]); H Yosef (Hairmyres Hospital, UK [29]); D Tsang, P Leonard, J Prejbisz (Southeast Hospital, UK [28]); J Ledermann, J Bridgewater (University College London Hospital, London, UK [27]); T Hickish, R Osborne (Poole Hospital, Dorset, UK [26]); A O'Callaghan, SR Muthuramalingam (Portsmouth Oncology Centre, Queen Alexandra Hospital, UK [25]); F Adab (University Hospital of North Staffordshire NHS Trust, UK [25]); NJ Wadd, J Van der Voet, D Wilson (James Cook University Hospital, UK [24]); (Singleton Hospital, UK [24]); I Pedley, A Azzabi (Sunderland Royal Hospital, UK [24]); E Marshall (Whiston Hospital, UK [24]); R James (Kent and Canterbury Hospital, UK [23]); F Daniel (Derriford Hospital, Plymouth, UK [22]); R Osborne (Dorset County Hospital, UK [22]); TJ Iveson (Salisbury District Hospital, UK [22]); D Jodrell, C McLean, S Clive, L Dawson, HA Philips (Western General Hospital, Edinburgh, UK [22]); S Falk (Yeovil District Hospital, UK [22]); R James (Queen Elizabeth, The Queen Mother Hospital, UK [21]); P Chakraborti, R Kulkarni (Royal Derby Hospital, UK [21]); LM Samuel, G MacDonald (Aberdeen Royal Infirmary, UK [20]); C Bradley, C Twelves (Bradford Royal Infirmary, UK [20]); S Giridharan, F Adab (Staffordshire General Hospital, UK [20]); S Myint (Southport & Formby District General Hospital, UK [18]); S Gollins (Wrexham Maelor Hospital, UK [18]); N Stuart, C Bale (Ysbyty Gwynedd Hospital, UK [18]); (William Harvey Hospital, UK [17]); J Valle, M Saunders, G Wilson (Christie Hospital, Manchester, UK [16]); A Weaver, A Jones (Churchill Hospital, Oxford, UK [16]); K McAdam, C Jephcott (Peterborough District Hospital, UK [16]); S Cleator (St. Mary's Hospital, London, UK [16]); (Worthing Hospital, UK [16]); J Glaholm (Good Hope Hospital, UK [15]); R Hughes, PM Mulholland (Lister Hospital, UK [15]); N Steven (Queen Elizabeth, University Hospital, Birmingham, UK [15]); A Mayer, T Meyer (Royal Free Hospital [15]); N Lo, G Cogill, L Toy (Torbay Hospital, UK [15]); M Wilkins (West Wales General Hospital, UK [15]); C Wilson, C Palmer (Addenbrooke's Hospital, UK [14]); I Geh (Birmingham Heartlands Hospital, UK [14]); R Thomas (Bedford Hospital NHS Trust [13]); J Nicoll (Cumberland Infirmary, UK [13]); P Chakraborti (Queens Hospital, Burton Upon Trent [13]); A Azzabi (South Tyneside Hospital, UK [13]); R Wilson, M Eatock (Belfast City Hospital, UK [12]); A Hartley (Manor Hospital, Walsall, UK [12]); J Gildersleve, A Freebairn (Berkshire Cancer Centre, Berkshire, UK [12]); GP Deutsch, A Webb, M Wilkins (Royal Sussex County Hospital, Brighton, UK [12]); F McKinna (Eastbourne District General Hospital [11]); D Cunningham, I Chau (Royal Marsden, Sutton, UK [11]); S Susnerwala, M Wise, A Birtle (Royal Preston Hospital, UK [11]); A Hamid (Scunthorpe General Hospital, UK [11]); FJ Lofts (St. George's Hospital, London, UK [11]); J Kennedy (St. James' Hospital, Dublin, Republic of Ireland [11]); D Willis (Raigmore Hospital, UK [10]); S Susnerwala (Blackpool Victoria Hospital, UK [9]); LT Tan, C Palmer (Hinchingsbrooke Hospital, UK [9]); N Maisey (Queen Elizabeth Hospital, UK [9]); M Keane (University College Hospital, Galway, Republic of Ireland [9]); C Macmillan, R Patel (Northampton General Hospital, UK [8]); D Farrugia (Worcestershire Royal Hospital, UK [8]); G Bertelli, V Vigneswaran (Withybush General Hospital, UK [7]); D Smith (Aintree, University Hospital, UK [6]); R McDermott (AMNCH, Tallaght Hospital, Dublin, Republic of Ireland [6]); S O'Reilly (Mercy Hospital, Cork, Republic of Ireland [6]); V Hall (Royal Hampshire County Hospital, Winchester, UK [6]); C

Hamilton, A Dhadda (Scarborough Hospital, UK [6]); C Baughan (St. Mary's Hospital, Isle Of Wight, UK [6]); H Ford, M Moody (West Suffolk Hospital, UK [6]); M Tomlinson (Weston General Hospital, Weston Super Mare, UK [6]); L Grogan, O Breathnach (Beaumont Hospital, Dublin, Republic of Ireland [4]); R Soomal (Ipswich Hospital NHS Trust, UK [4]); J McCaffrey (Mater Misericordiae Private Hospital, Dublin, Republic of Ireland [4]); J McCaffrey (Mater Misericordiae (Public) Hospital, Dublin, Republic of Ireland [4]); C Rees (North Hampshire Hospital, Basingstoke, UK [4]); PJ Atherton (North Tyneside General Hospital, UK [4]); S Beesley (Conquest Hospital, UK [3]); W Dobrowsky (Wansbeck General Hospital, UK [3]); G Leonard (Waterford Regional Hospital, Waterford, Republic of Ireland [3]); R Gupta (Midwestern Regional Hospital, Limerick, Republic of Ireland [2]); J Stewart (Milton Keynes General Hospital, UK [2]); D Cunningham (Royal Marsden Hospital, Fulham Road, London, UK [2]).

In addition to the above-named individuals, we acknowledge the contributions of a large number of clinicians, research nurses, data managers and other clinical and support staff at the participating centres.

## Definition of “Strategy Failure-Free Survival” SFFS

### Arm A

- Identical to Progression-Free Survival (PFS); that is, the earliest of:
  - Date of disease assessment if status is progressive disease (PD)
  - Date of COIN treatment failure if for progression or death
  - Date of death

### Arm C

- Date of disease assessment if status is PD and patient is on treatment
- Date of disease assessment if status is PD and patient is *off* treatment, if one of the following also applies:
  - within 8 weeks of coming off treatment (that is, so soon after coming off treatment that PD probably occurred while on treatment)
  - over 8 weeks off treatment but treatment does not recommence within one month (that is, failure of protocol with regard to re-starting treatment)
- Date of COIN treatment failure if for progression or death, whether on or off treatment

### Censoring:

- Date last seen
  - That is, latest recorded date of treatment cycle, toxicity/disease assessment, follow-up, date of COIN treatment failure, death, or randomisation

**Supplementary Tables**

**Table 1: Rates of G3+ toxicity symptoms (CTC v3.0) experienced after 12-week assessment by the PPA population**

|                                      | Arm A      |               | Arm C      |               | p-value  |
|--------------------------------------|------------|---------------|------------|---------------|----------|
|                                      | N          | (%)           | N          | (%)           |          |
| <b>Haematological toxicities</b>     |            |               |            |               |          |
| Platelets                            | 13         | (3%)          | 7          | (1%)          | P=0.12   |
| Haemoglobin                          | 6          | (1%)          | 15         | (3%)          | P=0.075  |
| WBC                                  | 16         | (3%)          | 11         | (2%)          | P=0.23   |
| Neutrophils                          | 56         | (12%)         | 40         | (8%)          | P=0.029  |
| <b>Non-haematological toxicities</b> |            |               |            |               |          |
| Nausea                               | 9          | (2%)          | 34         | (7%)          | P=0.0032 |
| Vomiting                             | 8          | (2%)          | 21         | (4%)          | P=0.027  |
| Diarrhoea                            | 38         | (8%)          | 50         | (10%)         | P=0.37   |
| HFS                                  | 21         | (5%)          | 15         | (3%)          | P=0.20   |
| Nail changes                         | 0          | (0%)          | 0          | (0%)          | --       |
| Skin rash                            | 0          | (0%)          | 2          | (<1%)         | P=0.50   |
| Peripheral neuropathy                | 126        | (27%)         | 25         | (5%)          | P<0.0001 |
| Hypomagnesaemia                      | 0          | (0%)          | 4          | (1%)          | P=0.13   |
| Anorexia                             | 13         | (3%)          | 28         | (5%)          | P=0.036  |
| Alopecia                             | 2          | (<1%)         | 1          | (<1%)         | P=0.61   |
| Pain                                 | 42         | (9%)          | 81         | (16%)         | P=0.0012 |
| Stomatitis                           | 6          | (1%)          | 5          | (1%)          | P=0.77   |
| Lethargy                             | 68         | (15%)         | 95         | (19%)         | P=0.091  |
| Vein pain                            | 1          | (<1%)         | 3          | (1%)          | P=0.63   |
| <b>Total</b>                         | <b>467</b> | <b>(100%)</b> | <b>511</b> | <b>(100%)</b> |          |

**Table 2: Baseline characteristics by availability of QoL data, PPA population**

|                                   | QoL data available at BL,<br>12wks and 24wks? |               |            |               | Total      |               | p-value |
|-----------------------------------|-----------------------------------------------|---------------|------------|---------------|------------|---------------|---------|
|                                   | No                                            |               | Yes        |               | N          | (%)           |         |
|                                   | N                                             | (%)           | N          | (%)           |            |               |         |
| <b>Treatment arm</b>              |                                               |               |            |               |            |               |         |
| Arm A                             | 188                                           | (45%)         | 279        | (50%)         | 467        | (48%)         | P=0.15  |
| Arm C                             | 229                                           | (55%)         | 282        | (50%)         | 511        | (52%)         |         |
| <b>Chemo regimen</b>              |                                               |               |            |               |            |               |         |
| XELOX                             | 274                                           | (66%)         | 356        | (63%)         | 630        | (64%)         | P=0.47  |
| OxMdG                             | 143                                           | (34%)         | 205        | (37%)         | 348        | (36%)         |         |
| <b>Sex</b>                        |                                               |               |            |               |            |               |         |
| Male                              | 280                                           | (67%)         | 377        | (67%)         | 657        | (67%)         | P=0.99  |
| Female                            | 137                                           | (33%)         | 184        | (33%)         | 321        | (33%)         |         |
| <b>Age at randomisation</b>       |                                               |               |            |               |            |               |         |
| <=65y                             | 239                                           | (57%)         | 338        | (60%)         | 577        | (59%)         | P=0.36  |
| >65y                              | 178                                           | (43%)         | 223        | (40%)         | 401        | (41%)         |         |
| <b>WHO PS</b>                     |                                               |               |            |               |            |               |         |
| 0                                 | 194                                           | (47%)         | 290        | (52%)         | 484        | (49%)         | P=0.20  |
| 1                                 | 194                                           | (47%)         | 242        | (43%)         | 436        | (45%)         |         |
| 2                                 | 29                                            | (7%)          | 29         | (5%)          | 58         | (6%)          |         |
| <b>Location of primary tumour</b> |                                               |               |            |               |            |               |         |
| Right colon                       | 110                                           | (26%)         | 133        | (24%)         | 243        | (25%)         | P=0.37  |
| Left colon/rectum                 | 305                                           | (73%)         | 422        | (76%)         | 727        | (75%)         |         |
| <b>Status of primary tumour</b>   |                                               |               |            |               |            |               |         |
| Resected                          | 219                                           | (53%)         | 314        | (56%)         | 533        | (56%)         | P=0.42  |
| Unresected                        | 177                                           | (42%)         | 226        | (40%)         | 403        | (41%)         |         |
| Local recurrence                  | 21                                            | (5%)          | 21         | (4%)          | 42         | (4%)          |         |
| <b>Liver-only metastases</b>      |                                               |               |            |               |            |               |         |
| No                                | 323                                           | (77%)         | 440        | (78%)         | 763        | (78%)         | P=0.72  |
| Yes                               | 94                                            | (23%)         | 121        | (22%)         | 215        | (22%)         |         |
| <b>No. of metastatic sites</b>    |                                               |               |            |               |            |               |         |
| 0/1                               | 150                                           | (36%)         | 182        | (32%)         | 332        | (34%)         | P=0.25  |
| 2+                                | 267                                           | (64%)         | 379        | (68%)         | 646        | (66%)         |         |
| <b>Timing of metastases</b>       |                                               |               |            |               |            |               |         |
| Metachronous                      | 122                                           | (29%)         | 174        | (31%)         | 296        | (30%)         | P=0.59  |
| Synchronous                       | 291                                           | (70%)         | 385        | (69%)         | 676        | (70%)         |         |
| <b>Total</b>                      | <b>417</b>                                    | <b>(100%)</b> | <b>561</b> | <b>(100%)</b> | <b>978</b> | <b>(100%)</b> |         |

|                             | QoL data available at BL,<br>12wks and 24wks? |               |            |               | Total      |               | p-value |
|-----------------------------|-----------------------------------------------|---------------|------------|---------------|------------|---------------|---------|
|                             | No                                            |               | Yes        |               | N          | (%)           |         |
|                             | N                                             | (%)           | N          | (%)           |            |               |         |
| <b>Prior radiotherapy</b>   |                                               |               |            |               |            |               |         |
| No                          | 407                                           | (98%)         | 548        | (98%)         | 955        | (98%)         | P=0.93  |
| Yes                         | 10                                            | (2%)          | 13         | (2%)          | 23         | (2%)          |         |
| <b>Prior surgery</b>        |                                               |               |            |               |            |               |         |
| No                          | 340                                           | (82%)         | 458        | (82%)         | 798        | (82%)         | P=0.97  |
| Yes                         | 77                                            | (18%)         | 103        | (18%)         | 180        | (18%)         |         |
| <b>Adjuvant chemo/radio</b> |                                               |               |            |               |            |               |         |
| No                          | 307                                           | (74%)         | 411        | (73%)         | 718        | (73%)         | P=0.90  |
| Yes                         | 110                                           | (26%)         | 150        | (27%)         | 260        | (27%)         |         |
| <b>Size of centre</b>       |                                               |               |            |               |            |               |         |
| Small                       | 142                                           | (34%)         | 193        | (34%)         | 335        | (34%)         | P=0.037 |
| Medium                      | 138                                           | (33%)         | 222        | (40%)         | 360        | (37%)         |         |
| Large                       | 137                                           | (33%)         | 146        | (26%)         | 283        | (29%)         |         |
| <b>WBC</b>                  |                                               |               |            |               |            |               |         |
| <10,000/l                   | 307                                           | (74%)         | 412        | (73%)         | 719        | (74%)         | P=0.95  |
| >=10,000/l                  | 110                                           | (26%)         | 149        | (27%)         | 259        | (26%)         |         |
| <b>Alk phos</b>             |                                               |               |            |               |            |               |         |
| <300 U/l                    | 350                                           | (84%)         | 486        | (87%)         | 836        | (86%)         | P=0.24  |
| >=300 U/l                   | 67                                            | (16%)         | 75         | (13%)         | 142        | (14%)         |         |
| <b>Platelet count</b>       |                                               |               |            |               |            |               |         |
| <400,000/l                  | 294                                           | (71%)         | 409        | (73%)         | 702        | (72%)         | P=0.49  |
| >=400,000/l                 | 120                                           | (29%)         | 151        | (27%)         | 270        | (28%)         |         |
| <b>Total</b>                | <b>417</b>                                    | <b>(100%)</b> | <b>561</b> | <b>(100%)</b> | <b>978</b> | <b>(100%)</b> |         |

**Table 3: Effect of baseline platelet count on 24-week QoL, PPA population**

|                                      | Normal platelet count<br>( $<400,000/l$ ) |              |           | Raised platelet count<br>( $\geq 400,000/l$ ) |              |          | Interaction |
|--------------------------------------|-------------------------------------------|--------------|-----------|-----------------------------------------------|--------------|----------|-------------|
|                                      | OR *                                      | 95% CI       | p-value   | OR *                                          | 95% CI       | p-value  | p-value     |
| <b>Functional scales</b>             |                                           |              |           |                                               |              |          |             |
| Physical functioning                 | 0.83                                      | (0.67, 1.02) | P=0.079   | 1.44                                          | (1.04, 2.00) | P=0.029  | P=0.0020    |
| Role functioning                     | 0.72                                      | (0.59, 0.87) | P=0.00063 | 1.15                                          | (0.85, 1.56) | P=0.37   | P=0.0064    |
| Emotional functioning                | 0.90                                      | (0.73, 1.11) | P=0.33    | 1.32                                          | (0.96, 1.82) | P=0.085  | P=0.030     |
| Cognitive functioning                | 0.79                                      | (0.64, 0.98) | P=0.034   | 1.19                                          | (0.86, 1.64) | P=0.31   | P=0.045     |
| Social functioning                   | 0.70                                      | (0.58, 0.85) | P=0.00031 | 1.17                                          | (0.86, 1.59) | P=0.31   | P=0.0046    |
| <b>Symptom scales</b>                |                                           |              |           |                                               |              |          |             |
| Fatigue                              | 0.60                                      | (0.49, 0.74) | P<0.0001  | 1.19                                          | (0.86, 1.65) | P=0.28   | P=0.00094   |
| Nausea/vomiting                      | 0.73                                      | (0.59, 0.92) | P=0.0073  | 1.00                                          | (0.70, 1.43) | P=0.99   | P=0.12      |
| Pain                                 | 1.18                                      | (0.96, 1.46) | P=0.12    | 2.14                                          | (1.54, 2.98) | P<0.0001 | P=0.0015    |
| Dyspnoea                             | 0.89                                      | (0.72, 1.1)  | P=0.31    | 1.38                                          | (0.98, 1.94) | P=0.066  | P=0.045     |
| Insomnia                             | 0.90                                      | (0.74, 1.11) | P=0.34    | 1.04                                          | (0.77, 1.41) | P=0.81   | P=0.37      |
| Appetite loss                        | 0.69                                      | (0.55, 0.86) | P=0.00075 | 1.11                                          | (0.81, 1.52) | P=0.53   | P=0.018     |
| Constipation                         | 0.65                                      | (0.52, 0.83) | P=0.00034 | 1.36                                          | (0.95, 1.93) | P=0.092  | P=0.0012    |
| Diarrhoea                            | 0.75                                      | (0.61, 0.93) | P=0.0092  | 0.84                                          | (0.60, 1.18) | P=0.32   | P=0.82      |
| Dry/sore mouth                       | 0.59                                      | (0.47, 0.74) | P<0.0001  | 0.83                                          | (0.59, 1.17) | P=0.28   | P=0.15      |
| Problems eating/drinking             | 0.55                                      | (0.37, 0.82) | P=0.0033  | 0.71                                          | (0.44, 1.15) | P=0.16   | P=0.37      |
| Problems handling small objects      | 0.51                                      | (0.41, 0.64) | P<0.0001  | 0.62                                          | (0.44, 0.89) | P=0.010  | P=0.58      |
| Trt interferes with daily activities | 0.56                                      | (0.46, 0.69) | P<0.0001  | 0.82                                          | (0.59, 1.14) | P=0.23   | P=0.15      |
| Trt has been worthwhile              | 1.04                                      | (0.80, 1.36) | P=0.76    | 1.68                                          | (1.05, 2.69) | P=0.031  | P=0.048     |
| <b>Global scales</b>                 |                                           |              |           |                                               |              |          |             |
| Global QoL                           | 0.86                                      | (0.71, 1.05) | P=0.13    | 1.36                                          | (0.99, 1.87) | P=0.059  | P=0.012     |

\* Odds ratios are for Arm C compared to Arm A, and are from ordinal regression models adjusting for previous timepoints (baseline, 12 weeks). ORs >1 indicate worse quality of life, and ORs <1 indicate better quality of life.
